# Supplementary material for: Optimization of the TeraTox assay for preclinical teratogenicity assessment
Source: bioRxiv or medRxiv preprint supplement (doi:10.1101/2021.07.06.451364), 2022-03-01
Supplement: Supplementary file [file media-1.pdf]

## Supplementary Data

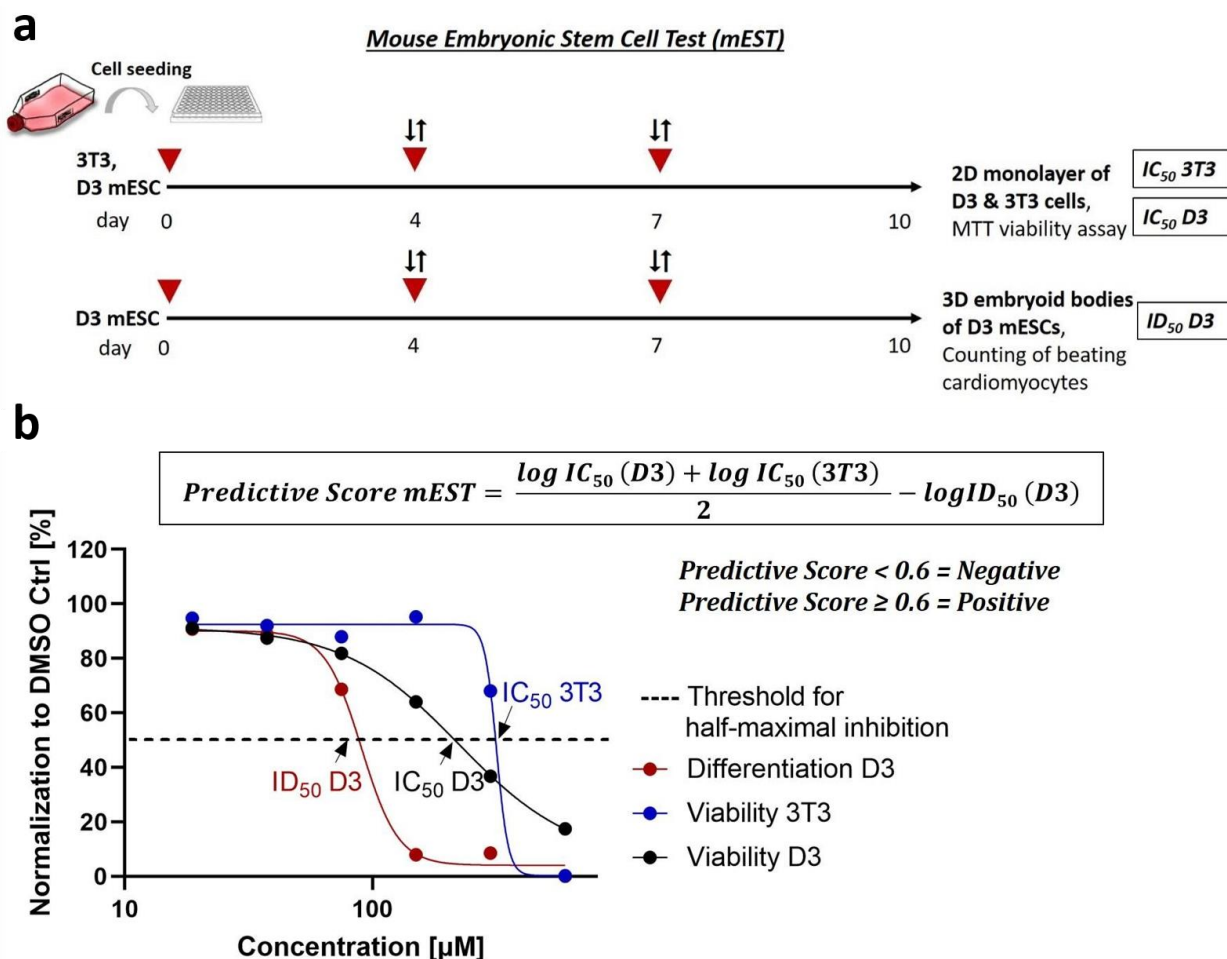

**Supplementary Figure S1: Mouse embryonic stem-cell test (mEST): assay workflow and prediction model.**

- (a)** Assay workflow. Mouse D3 and 3T3 cells are differentiated over a time course of 10 days to determine mEST endpoints ( $IC_{50}$  and  $ID_{50}$ ) for the calculation of the teratogenicity prediction score. Cells are treated with compounds in six-concentrations at day 0, day 4 and day 7. The endpoints are cell viability (D3 and 3T3 cells) and counting of beating cardiomyocytes at day 10 (derived from D3 EBs).
- (b)** The prediction model of the mEST assay and normalized concentration-response curves. Values are normalized to solvent (DMSO) controls to determine the half-maximal concentration of viability for D3 ESC ( $IC_{50}$  D3) and 3T3 fibroblasts ( $IC_{50}$  3T3) and half-maximal concentration of cardiomyocyte differentiation ( $ID_{50}$  D3), respectively. A predictive score of  $<0.6$  indicates non-teratogens whereas a predictive score  $\geq 0.6$  indicates teratogens.

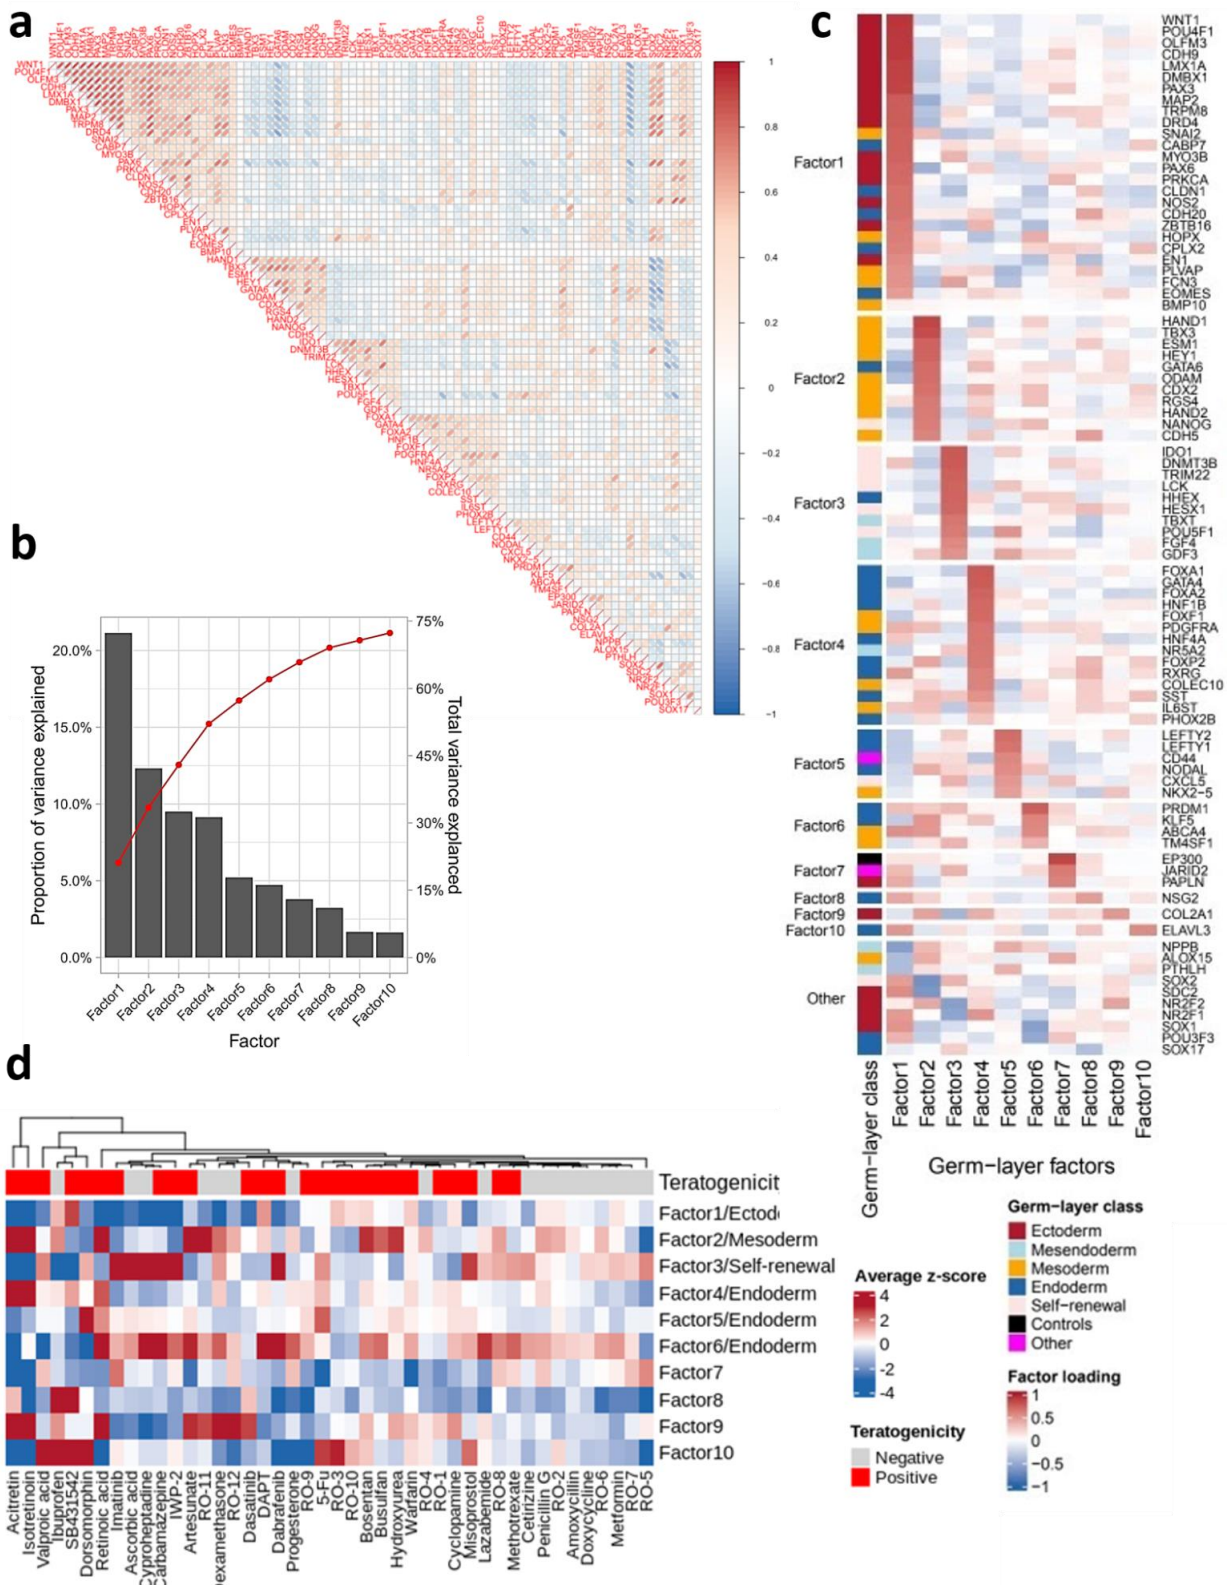

**Supplementary Figure S2: Factor analysis of germ-layer genes.**

- (a)** Pairwise Pearson correlation coefficients between germ-layer genes. Each row and each column indicate one gene. Red colors represent a strong correlation between expressions of genes whereas blue colors represent anti-correlation.
- (b)** Proportion of (co)variance explained by the first ten germ-layer factors (grey bars). Cumulatively, they explain more than 70% of total data variance (red line).
- (c)** Factor loading (like Figure 2b), with all gene symbols shown.
- (d)** Expression levels of germ-layer factors, represented as average z-scores of associated germ-layer genes, induced by compound treatments in the highest non-cytotoxic concentration (viability  $\geq$  80%). Blue colors indicate downregulation whereas red colors indicate upregulation of factors. The top side bar uses color to indicate compound classification: grey=non-teratogens, red=teratogens.

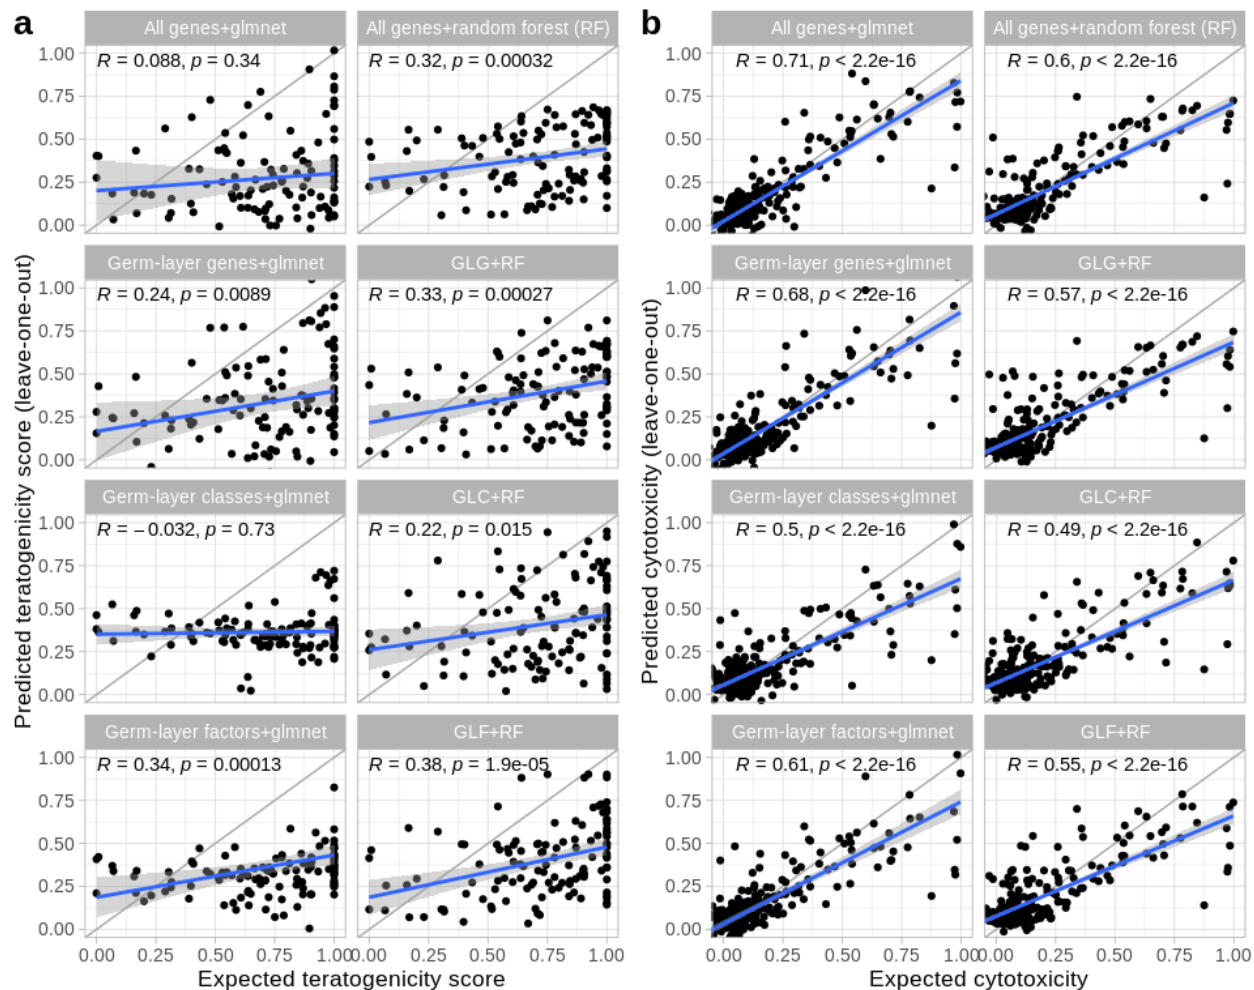

**Supplementary Figure S3: Leave-one-out prediction of teratogenicity scores and of cytotoxicity.**

- (a)** Prediction of teratogenicity scores using the leave-one-out scheme. For each combination of features and machine learning models, the teratogenicity score of each compound is predicted based on the scores of all other compounds. The predicted scores (y-axis) are compared with expected scores as defined in Fig. 3b. Each dot represents one concentration of one compound. The gray line indicates  $y=x$ .  $R$  gives the Spearman correlation coefficient, and  $p$  values are derived from the Spearman correlation test. The gray diagonal line represents  $y=x$ . The blue line indicates linear regression, with 95% confidence intervals in the gray area.
- (b)** Prediction of cytotoxicity using the leave-one-out scheme. All legends follow the definitions in Suppl. Fig. S3a.

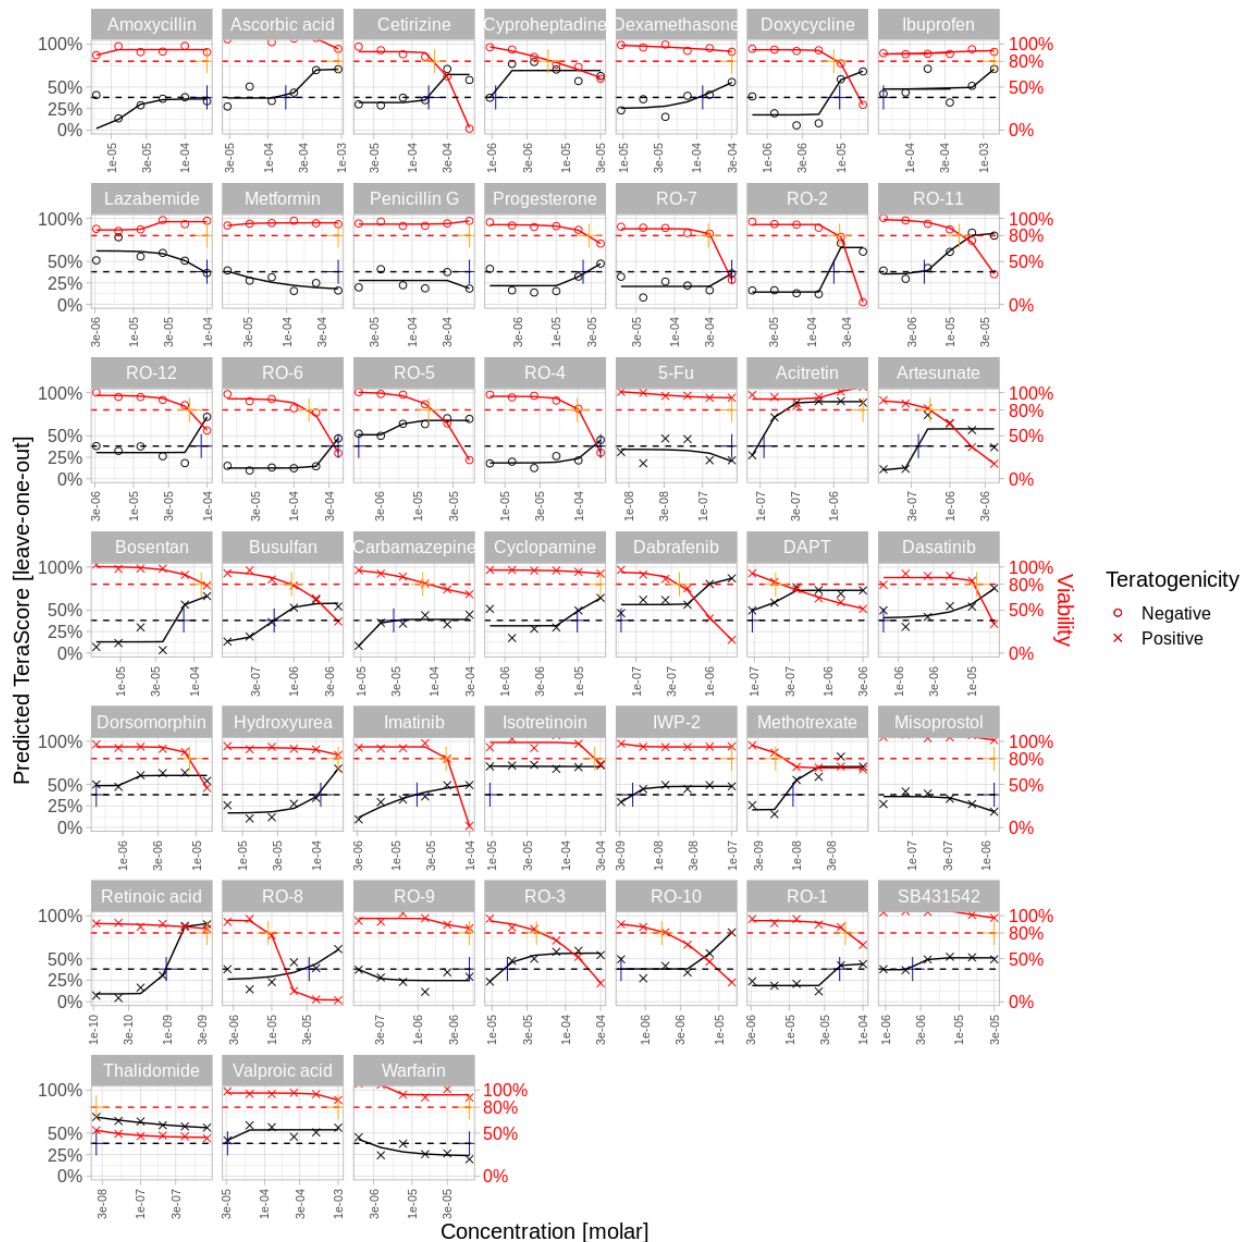

**Supplementary Figure S4: Classification of teratogenicity by Random Forest models.**

Concentration response curves of 45 reference compounds tested with the human *TeraTox* assay. Values for predicted teratogenicity were obtained by leave-one-out training/testing (median values of  $n=2$ ), values for cytotoxicity were measured in the assay and normalized by DMSO (which is set as 100%).  $NCC_{max}$  and  $TC_{min}$  are plotted based on at least 80% viability threshold and the optimal teratogenicity score threshold of 0.38. Curve fit was performed with the four-parameter model offered by the *drc* package.



**a**

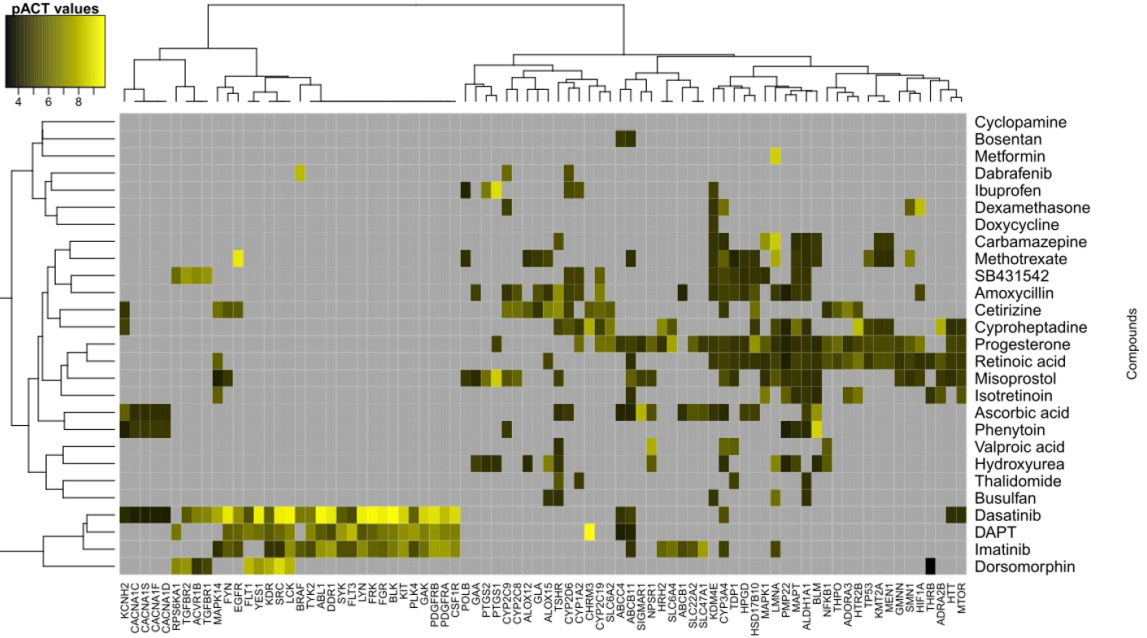

**b**

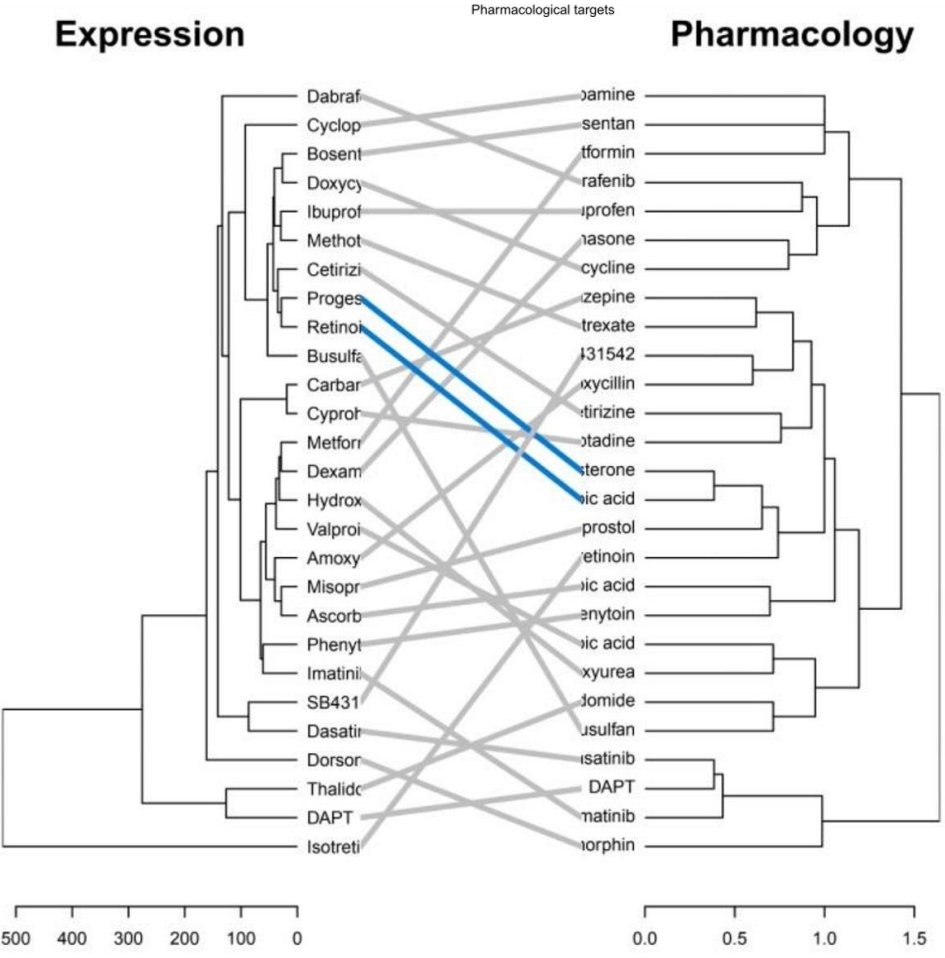

**Supplementary Figure S5: Pharmacological profiles of the drugs.**

- (a) Heatmap of target profiles of compounds. Only compounds with annotated targets in ChEMBL are shown. Each row represents one compound, and each column represents a human protein target. Colors indicate pACT values, which are absolute log<sub>10</sub> transformed assay values (*K<sub>i</sub>*, *IC<sub>50</sub>*, *etc.*). Gray cells mean that data is not available. Compounds are clustered by binary distance and the Ward method.
- (b) Two aligned dendrograms of differential gene expression and of pharmacology, linked by compounds. Left: dendrogram of differential gene expression profiles induced by compounds (average across concentration). Right: dendrogram of pharmacological profiles derived from Suppl. Fig. S5a. Lines connect the same compounds in two dendrograms. Gray lines: lack of correspondence. Blue lines: the same cluster is found in both dendrograms.

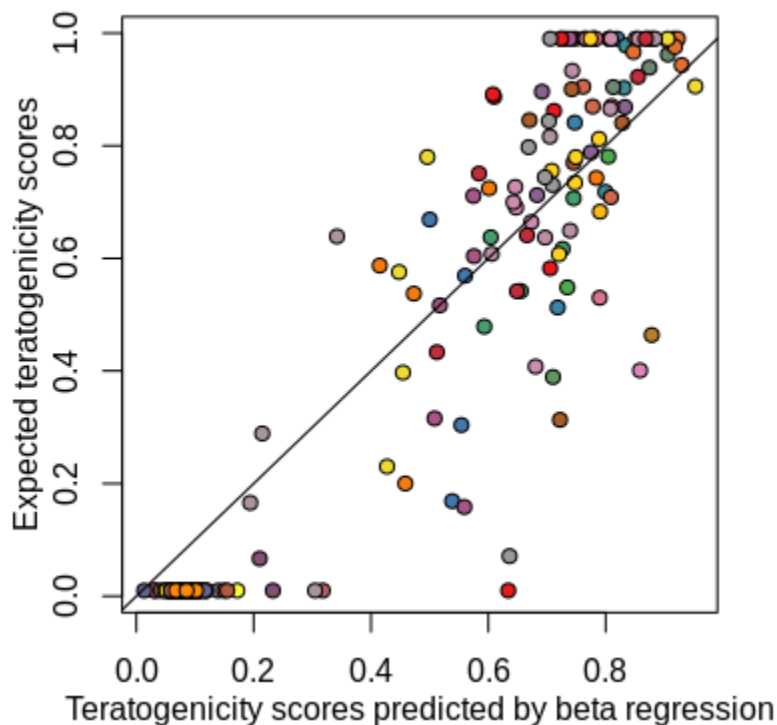

**Supplementary Figure S6: Performance of the generalized linear model with beta regression.**

Input to the regression model of ten germ-layer factors and significant interactions between them identified by a Bayesian network. The target variable is the teratogenicity score. We observe a good correlation

between predicted (x-axis) and expected (y-axis) teratogenicity scores that are defined by cosine similarity. Each dot represents one concentration of one compound. Colors are used to represent different drugs. The diagonal line indicates  $y=x$ .

**Supplementary Table S1: Human teratogenicity classification for commercial compounds**

Classifications and human therapeutic plasma concentrations ( $C_{max}$ ) were obtained from official data of the U.S. food and drug administration (FDA USPI) or from literature.

| <i>Reference Compound</i> | <i>Teratogenicity Classification</i> | <i>Maximal therapeutic plasma concentration (<math>C_{max}</math>) [<math>\mu</math>M]</i> | <i>Reference</i> |
|---------------------------|--------------------------------------|--------------------------------------------------------------------------------------------|------------------|
| Acitretin                 | <b>Positive</b>                      | 2.4                                                                                        | (3,88)           |
| Amoxicillin               | Negative                             | 13.8                                                                                       | (52-54)          |
| Artesunate                | <b>Positive</b>                      | 1.16                                                                                       | (38,89)          |
| Ascorbic Acid             | Negative                             | 49,000                                                                                     | (56,90-92)       |
| Bosentan                  | <b>Positive</b>                      | 1.1                                                                                        | (31,95)          |
| Busulfan                  | <b>Positive</b>                      | 0.52                                                                                       | (3,39)           |
| Carbamazepine             | <b>Positive</b>                      | 49                                                                                         | (3,32,96-98)     |
| Cetirizine                | Negative                             | 0.84                                                                                       | (3,57,58)        |
| Cyclopamine               | <b>Positive</b>                      | n/a                                                                                        | (43,44,47)       |
| Cyproheptadine            | Negative                             | 104.4                                                                                      | (59,60)          |
| Dabrafenib                | <b>Positive</b>                      | 2.8                                                                                        | (3,40)           |
| DAPT                      | <b>Positive</b>                      | n/a                                                                                        | (46)             |
| Dasatinib                 | <b>Positive</b>                      | 0.22                                                                                       | (3,41,100)       |
| Dexamethasone             | Negative                             | 0.48                                                                                       | (61)             |



|                 |                 |      |                 |
|-----------------|-----------------|------|-----------------|
| Dorsomorphin    | <b>Positive</b> | n/a  | (47)            |
| Doxycycline     | Negative        | 13.6 | (54,62,101-103) |
| 5-Fluorouracil  | <b>Positive</b> | 222  | (3,104)         |
| Hydroxyurea     | <b>Positive</b> | 684  | (3,33,106)      |
| Ibuprofen       | Negative        | 286  | (3,63,64)       |
| Isotretinoin    | <b>Positive</b> | 1    | (3,35,107)      |
| Imatinib        | <b>Positive</b> | 6.6  | (3,34,108)      |
| IWP-2           | <b>Positive</b> | n/a  | (47)            |
| Lazabemide      | Negative        | n/a  | (109)           |
| Metformin       | Negative        | 9    | (65,110)        |
| Methotrexate    | <b>Positive</b> | 4.7  | (3,36)          |
| Misoprostol     | <b>Positive</b> | n/a  | (111)           |
| Penicillin G    | Negative        | 1150 | (66,112)        |
| Progesterone    | Negative        | 0.06 | (68,114)        |
| Retinoic Acid   | <b>Positive</b> | 1.31 | (3,115-117)     |
| SB431542        | <b>Positive</b> | n/a  | (51)            |
| (±) Thalidomide | <b>Positive</b> | 2.4  | (3,118)         |
| Valproic Acid   | <b>Positive</b> | 1423 | (3,37)          |
| Warfarin        | <b>Positive</b> | 6.8  | (121,122)       |

**Supplementary Table S2: *In vivo* EFD study data for developmental compounds.**

Developmental compounds provided by F. Hoffmann- La Roche (compound annotation was blinded due to confidential regulations). Studies for embryo-fetal development were either performed at Roche or contract research organizations. Compounds were generally classified as positive if effects were obtained in at least one species. Maximal protein plasma binding for the lowest observed adverse effect levels (LOAEL  $C_{max}$ ) from the lowest dose where effects have been observed were averaged. Data were obtained from the Master Thesis of Thomas Sergejew 2015 (73).

| <i>Reference Compound</i> | <i>Teratogenicity Classification</i> | <i>in vivo data</i> |                                                        |                 |                                                        |
|---------------------------|--------------------------------------|---------------------|--------------------------------------------------------|-----------------|--------------------------------------------------------|
|                           |                                      | <i>Rat</i>          | <i>LOAEL <math>C_{max}</math> [<math>\mu M</math>]</i> | <i>Rabbit</i>   | <i>LOAEL <math>C_{max}</math> [<math>\mu M</math>]</i> |
| RO-1                      | <b>Positive</b>                      | <b>Positive</b>     | 18.5                                                   | <b>Positive</b> | 37                                                     |
| RO-2                      | Negative                             | Negative            | n/a                                                    | Negative        | n/a                                                    |
| RO-3                      | <b>Positive</b>                      | <b>Positive</b>     | 91                                                     | n/a             | n/a                                                    |
| RO-4                      | Negative                             | Negative            | n/a                                                    | n/a             | n/a                                                    |
| RO-5                      | Negative                             | Negative            | n/a                                                    | n/a             | n/a                                                    |
| RO-6                      | Negative                             | Negative            | n/a                                                    | Negative        | n/a                                                    |
| RO-7                      | Negative                             | Negative            | n/a                                                    | n/a             | n/a                                                    |
| RO-8                      | <b>Positive</b>                      | <b>Positive</b>     | 54                                                     | <b>Positive</b> | 32                                                     |
| RO-9                      | <b>Positive</b>                      | Negative            | n/a                                                    | <b>Positive</b> | 0.94                                                   |
| RO-10                     | <b>Positive</b>                      | Negative            | n/a                                                    | <b>Positive</b> | 41                                                     |
| RO-11                     | Negative                             | Negative            | n/a                                                    | n/a             | n/a                                                    |
| RO-12                     | Negative                             | Negative            | n/a                                                    | Negative        | n/a                                                    |



**Supplementary Table S3: Germ-layer gene panel.**

Representative developmental markers (germ-layers) are classified into endoderm, ectoderm, mesoderm, mesendoderm, pluripotency (self-renewal) and other categories, as described by Tsankov *et al.* (25,29,35).

| <b>Endoderm</b> | <b>Ectoderm</b> | <b>Mesoderm</b> | <b>Self-Renewal</b> | <b>Mesendoderm</b> |
|-----------------|-----------------|-----------------|---------------------|--------------------|
| CABP7           | WNT1            | SNAI2           | NANOG               | T                  |
| CLDN1           | POU4F1          | HOPX            | IDO1                | FGF4               |
| CDH20           | OLFM3           | PLVAP           | DNMT3B              | GDF3               |
| CPLX2           | CDH9            | FCN3            | TRIM22              | NR5A2              |
| EOMES           | LMX1A           | BMP10           | LCK                 | NPPB               |
| GATA6           | DMBX1           | HAND1           | HESX1               | PTHLH              |
| HHEX            | PAX3            | TBX3            | POU5F1              |                    |
| FOXA1           | MAP2            | ESM1            | CXCL5               |                    |
| GATA4           | TRPM8           | HEY1            | SOX2                |                    |
| FOXA2           | DRD4            | ODAM            |                     |                    |
| HNF1B           | MYO3B           | CDX2            |                     |                    |
| HNF4A           | PAX6            | RGS4            |                     |                    |
| FOXP2           | PRKCA           | HAND2           |                     |                    |
| RXRG            | NOS2            | CDH5            |                     |                    |
| SST             | ZBTB16          | FOXF1           |                     |                    |
| PHOX2B          | EN1             | PDGFRA          |                     |                    |
| LEFTY2          | PAPLN           | COLEC10         |                     |                    |
| LEFTY1          | COL2A1          | IL6ST           |                     |                    |
| NODAL           | SDC2            | NKX2-5          |                     |                    |
| PRDM1           | NR2F2           | ABCA4           |                     |                    |
| KLF5            | NR2F1/NR2F2     | TM4SF1          |                     |                    |
| HMP19           | SOX1            | ALOX15          |                     |                    |
| ELAVL3          |                 |                 |                     |                    |
| POU3F3          |                 |                 |                     |                    |
| SOX17           |                 |                 |                     |                    |

**Supplementary Table S4: Teratogenicity Prediction of Reference Compounds.**

Classification of positive and negative reference compounds by the human *TeraTox* assay with associated maximum non-cytotoxic concentrations ( $NCC_{max}$ ) and minimal teratogenic concentrations ( $TC_{min}$ ) and its calculated predictive *TeraTox* score. Classification of the mouse EST with associated half-maximal concentrations for inhibition of growth for D3 mouse ESC ( $IC_{50D3}$ ) and 3T3 fibroblasts ( $IC_{503T3}$ ) and half-maximal concentrations for inhibition of differentiation into beating cardiomyocytes for D3 mouse ESC ( $ID_{50D3}$ ) and its calculated predictive score. TN= true negative, TP= true positive, FN= false negative, FP= false positive, values of several assay runs were averaged,  $n \geq 3$ , \*highly cytotoxic

| Reference Compound | Teratogenicity classification | Human <i>TeraTox</i> Assay |                           |                         |                                           | Mouse embryonic stem cell test |                             |                            |                            |                                           |
|--------------------|-------------------------------|----------------------------|---------------------------|-------------------------|-------------------------------------------|--------------------------------|-----------------------------|----------------------------|----------------------------|-------------------------------------------|
|                    |                               | $NCC_{max}$<br>[ $\mu M$ ] | $TC_{min}$<br>[ $\mu M$ ] | <i>TeraTox</i><br>score | <i>Predicted</i><br><i>Teratogenicity</i> | $IC_{50D3}$<br>[ $\mu M$ ]     | $IC_{503T3}$<br>[ $\mu M$ ] | $ID_{50D3}$<br>[ $\mu M$ ] | <i>Predictive</i><br>Score | <i>Predicted</i><br><i>Teratogenicity</i> |
| Amoxicillin        | Negative                      | 200                        | 200                       | 0.00                    | TN                                        | 2500                           | 2500                        | 2467                       | 0.01                       | TN                                        |
| Ascorbic acid      | Negative                      | 900                        | 174                       | 0.71                    | <b>FP</b>                                 | 1104                           | 2000                        | 2000                       | n/a                        | TN                                        |
| Cetirizine         | Negative                      | 201                        | 167                       | 0.08                    | <b>FP</b>                                 | 332                            | 500                         | 215                        | 0.27                       | TN                                        |
| Cyproheptadine     | Negative                      | 5.8                        | 1.1                       | 0.72                    | <b>FP</b>                                 | 12                             | 45                          | 0.7                        | 1.55                       | <b>FP</b>                                 |
| Dexamethasone      | Negative                      | 300                        | 120                       | 0.40                    | <b>FP</b>                                 | 87                             | 300                         | 55                         | 0.46                       | TN                                        |
| Doxycycline        | Negative                      | 8.0                        | 9.6                       | -0.08                   | TN                                        | 244                            | 397                         | 11.3                       | 1.44                       | <b>FP</b>                                 |

|              |          |      |      |       |           |      |      |      |      |           |
|--------------|----------|------|------|-------|-----------|------|------|------|------|-----------|
| Ibuprofen    | Negative | 1400 | 43.7 | 1.50  | <b>FP</b> | 2628 | 1380 | 1166 | 0.21 | TN        |
| Lazabemide   | Negative | 100  | 100  | 0.00  | TN        | 59   | 235  | 106  | 0.05 | TN        |
| Metformin    | Negative | 500  | 500  | 0.00  | TN        | 500  | 500  | 500  | n/a  | TN        |
| Penicillin G | Negative | 600  | 600  | 0.00  | TN        | 2000 | 2000 | 2000 | n/a  | TN        |
| Progesterone | Negative | 28   | 23   | 0.08  | <b>FP</b> | 58   | 36   | 24   | 0.29 | TN        |
| RO-7         | Negative | 289  | 600  | -0.32 | TN        | 227  | 227  | 129  | 0.25 | TN        |
| RO-2         | Negative | 241  | 201  | 0.08  | <b>FP</b> | 47   | 68   | 90   | n/a  | TN        |
| RO-11        | Negative | 13   | 4.5  | 0.46  | <b>FP</b> | 32   | 13   | 5.3  | 0.59 | <b>BL</b> |
| RO-12        | Negative | 58   | 83   | -0.16 | TN        | 92   | 137  | 37   | 0.48 | TN        |
| RO-6         | Negative | 161  | 400  | -0.40 | TN        | 386  | 515  | 438  | 0.01 | TN        |
| RO-5         | Negative | 14   | 1.6  | 0.94  | <b>FP</b> | 9.1  | 5.8  | 4.1  | 0.25 | TN        |



|               |          |     |      |       |    |      |      |      |      |    |
|---------------|----------|-----|------|-------|----|------|------|------|------|----|
| RO-4          | Negative | 96  | 200  | -0.32 | TN | 39   | 170  | 2.5  | 1.51 | FP |
| 5-FU          | Positive | 0.3 | 0.3  | 0.00  | FN | 0.5  | 2.0  | 0.3  | 0.48 | FN |
| Acitretin     | Positive | 2.5 | 0.1  | 1.39  | TP | 0.2  | 129  | 0.0  | 2.64 | TP |
| Artesunate    | Positive | 0.5 | 0.4  | 0.09  | TP | 3.2  | 6.5  | 1.3  | 0.53 | FN |
| Bosentan      | Positive | 125 | 72   | 0.24  | TP | 19.3 | 70.6 | 22.1 | 0.22 | FN |
| Busulfan      | Positive | 0.9 | 0.5  | 0.25  | TP | 19.3 | 70.6 | 22.1 | 0.22 | FN |
| Carbamazepine | Positive | 70  | 28   | 0.40  | TP | 372  | 393  | 207  | 0.26 | FN |
| Cyclopamine   | Positive | 20  | 9.6  | 0.32  | TP | 22   | 76   | 5.9  | 0.84 | TP |
| Dabrafenib    | Positive | 0.4 | 0.06 | 0.82  | TP | 23   | 23   | 20   | 0.07 | FN |
| DAPT          | Positive | 0.2 | 0.09 | 0.35  | TP | 324  | 176  | 35   | 0.83 | TP |
| Dasatinib     | Positive | 12  | 0.6  | 1.31  | TP | 4.3  | 0.6  | 3.7  | n/a  | TP |

|               |                 |       |       |       |           |       |      |       |      |           |
|---------------|-----------------|-------|-------|-------|-----------|-------|------|-------|------|-----------|
| Dorsomorphin  | <b>Positive</b> | 8.1   | 0.4   | 1.31  | TP        | 1.9   | 1.4  | 0.7   | 0.34 | <b>FN</b> |
| Hydroxyurea   | <b>Positive</b> | 200   | 116   | 0.24  | TP        | 51    | 89   | 23    | 0.47 | <b>FN</b> |
| Imatinib      | <b>Positive</b> | 48    | 19    | 0.40  | TP        | 12    | 22   | 7     | 0.39 | <b>FN</b> |
| Isotretinoin  | <b>Positive</b> | 250   | 9.4   | 1.42  | TP        | 33    | 121  | 0.5   | 2.10 | TP        |
| IWP-2         | <b>Positive</b> | 0.1   | 4.5E3 | 1.35  | TP        | 15.5  | 55   | 1     | 1.47 | TP        |
| Methotrexate  | <b>Positive</b> | 5.2E3 | 9E3   | -0.23 | <b>FN</b> | 0.2   | 0.1  | 0.1   | 0.10 | <b>FN</b> |
| Misoprostol   | <b>Positive</b> | 1.30  | 1.30  | 0.00  | <b>FN</b> | 23    | 13   | 40    | n/a  | <b>FN</b> |
| Retinoic acid | <b>Positive</b> | 3.5E3 | 9.8E4 | 0.55  | TP        | 0.004 | 77.9 | 0.014 | 1.60 | TP        |
| RO-8          | <b>Positive</b> | 9.0   | 32    | -0.55 | <b>FN</b> | 110   | 104  | 85    | 0.10 | <b>FN</b> |
| RO-9          | <b>Positive</b> | 5.0   | 5.0   | 0.00  | <b>FN</b> | 40    | 21   | 3.7   | 0.89 | TP        |
| RO-3          | <b>Positive</b> | 40    | 16    | 0.40  | TP        | 77    | 147  | 18    | 0.77 | TP        |

|               |                 |      |      |      |           |      |      |      |      |           |
|---------------|-----------------|------|------|------|-----------|------|------|------|------|-----------|
| RO-10         | <b>Positive</b> | 1.7  | 0.5  | 0.53 | TP        | 5.1  | 4.2  | 1    | 0.67 | TP        |
| RO1           | <b>Positive</b> | 58   | 48   | 0.08 | TP        | 68   | 180  | 24   | 0.66 | TP        |
| SB431542      | <b>Positive</b> | 30   | 2.3  | 1.11 | TP        | 36   | 21   | 5.8  | 0.68 | TP        |
| Thalidomide   | <b>Positive</b> | 0.03 | 0.03 | n/a* | TP        | 2000 | 2000 | 2000 | n/a  | <b>FN</b> |
| Valproic acid | <b>Positive</b> | 1000 | 31   | 1.51 | TP        | 1252 | 2859 | 441  | 0.63 | TP        |
| Warfarin      | <b>Positive</b> | 60   | 60   | 0.00 | <b>FN</b> | 1892 | 895  | 974  | 0.13 | <b>FN</b> |
